# Supplementary material for: Real-World Safety and Efficacy Outcomes with Abiraterone Acetate Plus Prednisone or Prednisolone as the First- or Second-Line Treatment for Metastatic Castration-Resistant Prostate Cancer: Data from the Prostate Cancer Registry
Source: PubMed Central journal article supplement — Target Oncol. 2021 Apr 7;16(3):357–67. doi: 10.1007/s11523-021-00807-4 (PMC8105236; doi:10.1007/s11523-021-00807-4), 2021-04-07
Supplement: 11523_2021_807_MOESM1_ESM.pdf [file 11523_2021_807_MOESM1_ESM.pdf]

**Real-World Safety and Efficacy Outcomes with Abiraterone Acetate Plus Prednisone or Prednisolone as the First- or Second-Line Treatment for Metastatic Castration-Resistant Prostate Cancer: Data from the Prostate Cancer Registry**

Anders Bjartell · Nicolaas Lumen · Pablo Maroto · Thomas Paiss · Francisco Gomez Veiga · Alison Birtle · Gero Kramer · Ewa Kalinka · Dominique Spaëth · Susan Feyerabend · Vsevolod Matveev · Florence Lefresne · Martin Lukac · Robert Wapenaar · Luis Costa · Simon Chowdhury

**Corresponding author:**

Anders Bjartell MD PhD FEBU  
Professor in Urology, Dept of Translational Medicine, Medical Faculty, Lund University  
Senior Consultant, Dept of Urology, Skåne University Hospital  
Jan Waldenströms gata 5, SE 205 02 Malmö, Sweden  
E-mail: anders.bjartell@med.lu.se

**Supplementary figure**

**Fig. S1** Study flow.

mCRPC, metastatic castration-resistant prostate cancer.

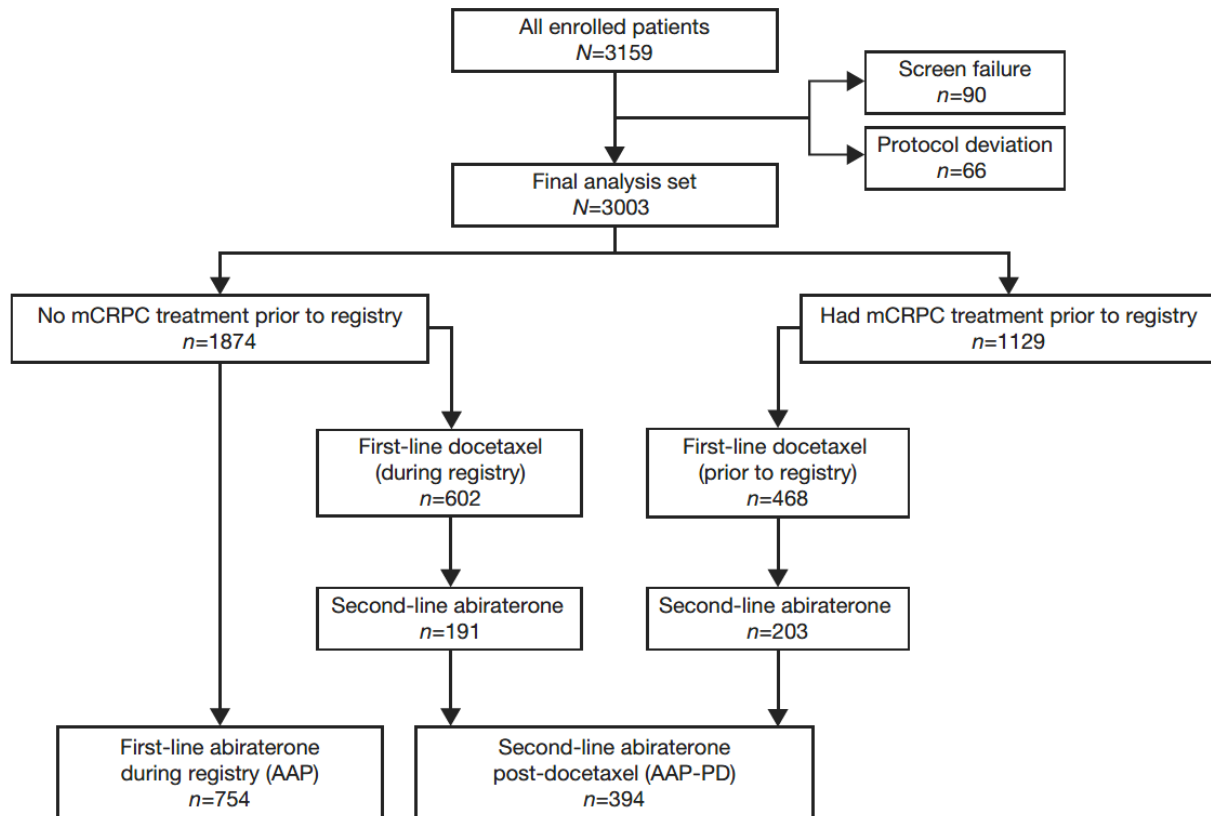

**Table S1** Treatment-emergent adverse events of special interest

|                                                  | AAP                     |                                                 | AAP-PD                  |                                                 |
|--------------------------------------------------|-------------------------|-------------------------------------------------|-------------------------|-------------------------------------------------|
|                                                  | All patients<br>(N=754) | Patients with<br>CV<br>comorbidities<br>(n=504) | All patients<br>(N=394) | Patients with<br>CV<br>comorbidities<br>(n=234) |
| Number of patients with at least one TEAE, n (%) | 487 (64.6)              | 338 (67.1)                                      | 222 (56.3)              | 132 (56.4)                                      |
| <i>Preferred term, n (%)</i>                     |                         |                                                 |                         |                                                 |
| Vascular disorders                               | 69 (9.2)                | 42 (8.3)                                        | 26 (6.6)                | 18 (7.7)                                        |
| Hypertension                                     | 24 (3.2)                | 12 (2.4)                                        | 5 (1.3)                 | 3 (1.3)                                         |
| Hot flush                                        | 20 (2.7)                | 14 (2.8)                                        | 9 (2.3)                 | 4 (1.7)                                         |
| Hypotension                                      | 6 (0.8)                 | 3 (0.6)                                         | 2 (0.5)                 | 1 (0.4)                                         |
| Intermittent claudication                        | -                       | -                                               | 2 (0.5)                 | 2 (0.9)                                         |
| Hematoma                                         | 5 (0.7)                 | 3 (0.6)                                         | -                       | -                                               |
| Lymphoedema                                      | 5 (0.7)                 | 1 (0.2)                                         | 1 (0.3)                 | 1 (0.4)                                         |
| Deep vein thrombosis                             | 2 (0.3)                 | 2 (0.4)                                         | 1 (0.3)                 | 1 (0.4)                                         |
| Hypertensive crisis                              | 2 (0.3)                 | -                                               | -                       | -                                               |
| Orthostatic hypotension                          | 2 (0.3)                 | 2 (0.4)                                         | 1 (0.3)                 | 1 (0.4)                                         |
| Peripheral arterial occlusive disease            | -                       | -                                               | 1 (0.3)                 | 1 (0.4)                                         |
| Peripheral artery stenosis                       | -                       | -                                               | 1 (0.3)                 | -                                               |
| Phlebitis                                        | 2 (0.3)                 | 1 (0.2)                                         | 1 (0.3)                 | -                                               |
| Thrombophlebitis                                 | -                       | -                                               | 1 (0.3)                 | -                                               |
| Aortic stenosis                                  | 1 (0.1)                 | 1 (0.2)                                         | -                       | -                                               |
| Capillary fragility                              | 1 (0.1)                 | 1 (0.2)                                         | -                       | -                                               |
| Circulatory collapse                             | 1 (0.1)                 | 1 (0.2)                                         | -                       | -                                               |
| Flushing                                         | 1 (0.1)                 | 1 (0.2)                                         | -                       | -                                               |
| Pallor                                           | 1 (0.1)                 | 1 (0.2)                                         | -                       | -                                               |
| Peripheral coldness                              | 1 (0.1)                 | 1 (0.2)                                         | -                       | -                                               |
| Subclavian vein thrombosis                       | 1 (0.1)                 | -                                               | -                       | -                                               |
| Superior vena cava stenosis                      | 1 (0.1)                 | -                                               | -                       | -                                               |
| Thrombosis                                       | 1 (0.1)                 | -                                               | 2 (0.5)                 | 2 (0.9)                                         |
| Aortic aneurism                                  | -                       | -                                               | 1 (0.3)                 | 1 (0.4)                                         |

|                                     |          |          |          |          |
|-------------------------------------|----------|----------|----------|----------|
| Arterial disorder                   | -        | -        | 1 (0.3)  | 1 (0.4)  |
| Capillary leak syndrome             | -        | -        | 1 (0.3)  | 1 (0.4)  |
| Varicose vein                       | 1 (0.1)  | -        | -        | -        |
| Vasculitis                          | 1 (0.1)  | -        | -        | -        |
| Venous thrombosis                   | 1 (0.1)  | -        | -        | -        |
| Cardiac disorders                   | 55 (7.3) | 39 (7.7) | 16 (4.1) | 9 (3.8)  |
| Cardiac failure                     | 12 (1.6) | 11 (2.2) | 4 (1.0)  | 3 (1.3)  |
| Atrial fibrillation                 | 11 (1.5) | 8 (1.6)  | 3 (0.8)  | 3 (1.3)  |
| Myocardial infarction               | 7 (0.9)  | 6 (1.2)  | 2 (0.5)  | 2 (0.9)  |
| Angina pectoris                     | 6 (0.8)  | 5 (1.0)  | 1 (0.3)  | -        |
| Myocardial ischemia                 | 3 (0.4)  | 1 (0.2)  | -        | -        |
| Cardiac failure congestive          | 2 (0.3)  | 2 (0.4)  | 1 (0.3)  | -        |
| Palpitations                        | 2 (0.3)  | -        | -        | -        |
| Tachycardia                         | 2 (0.3)  | -        | 1 (0.3)  | -        |
| Acute coronary syndrome             | 1 (0.1)  | -        | -        | -        |
| Acute myocardial infarction         | 1 (0.1)  | 1 (0.2)  | 1 (0.3)  | 1 (0.4)  |
| Angina unstable                     | 1 (0.1)  | 1 (0.2)  | 1 (0.3)  | -        |
| Aortic valve sclerosis              | -        | -        | 1 (0.3)  | -        |
| Aortic valve stenosis               | 1 (0.1)  | 1 (0.2)  | 1 (0.3)  | -        |
| Arrhythmia                          | 1 (0.1)  | -        | 1 (0.3)  | 1 (0.4)  |
| Atrioventricular block first degree | -        | -        | 1 (0.3)  | -        |
| Atrial flutter                      | 1 (0.1)  | -        | -        | -        |
| Bradycardia                         | 1 (0.1)  | 1 (0.2)  | -        | -        |
| Cardiac arrest                      | 1 (0.1)  | -        | -        | -        |
| Cardiac disorder                    | 1 (0.1)  | -        | -        | -        |
| Cardiac failure chronic             | 1 (0.1)  | 1 (0.2)  | -        | -        |
| Cardiopulmonary failure             | 1 (0.1)  | 1 (0.2)  | -        | -        |
| Cardiotoxicity                      | 1 (0.1)  | 1 (0.2)  | -        | -        |
| Coronary artery disease             | 1 (0.1)  | -        | -        | -        |
| Coronary artery stenosis            | 1 (0.1)  | 1 (0.2)  | -        | -        |
| Left ventricular failure            | 1 (0.1)  | 1 (0.2)  | -        | -        |
| Supraventricular tachycardia        | 1 (0.1)  | 1 (0.2)  | -        | -        |
| Metabolism and nutrition disorders  | 59 (7.8) | 42 (8.3) | 19 (4.8) | 11 (4.7) |

|                                      |          |          |         |         |
|--------------------------------------|----------|----------|---------|---------|
| Decreased appetite                   | 16 (2.1) | 10 (2.0) | 8 (2.0) | 7 (3.0) |
| Hypokalemia                          | 16 (2.1) | 12 (2.4) | 3 (0.8) | 2 (0.9) |
| Hyperglycemia                        | 11 (1.5) | 8 (1.6)  | 1 (0.3) | -       |
| Hypocalcemia                         | 10 (1.3) | 6 (1.2)  | -       | -       |
| Hyperkalemia                         | 5 (0.7)  | 3 (0.6)  | -       | -       |
| Diabetes mellitus                    | 4 (0.5)  | 3 (0.6)  | -       | -       |
| Hypertriglyceridemia                 | 3 (0.4)  | 2 (0.4)  | -       | -       |
| Hyponatremia                         | 3 (0.4)  | 3 (0.6)  | -       | -       |
| Dehydration                          | 2 (0.3)  | 2 (0.4)  | 1 (0.3) | 1 (0.4) |
| Folate deficiency                    | -        | -        | 1 (0.3) | -       |
| Hypoalbuminemia                      | 2 (0.3)  | -        | 1 (0.3) | 1 (0.4) |
| Hypomagnesemia                       | -        | -        | 2 (0.5) | 1 (0.4) |
| Cachexia                             | 1 (0.1)  | -        | 1 (0.3) | 1 (0.4) |
| Diabetes mellitus inadequate control | 1 (0.1)  | 2 (0.4)  | 1 (0.3) | -       |
| Diabetic metabolic decompensation    | 1 (0.1)  | 1 (0.2)  | 1 (0.3) | -       |
| Dyslipidemia                         | 1 (0.1)  | 1 (0.2)  | 1 (0.3) | -       |
| Hypercalcemia                        | 1 (0.1)  | 1 (0.2)  | 1 (0.3) | -       |
| Hypoproteinemia                      | 1 (0.1)  | 1 (0.2)  | -       | -       |
| Increased appetite                   | 1 (0.1)  | 1 (0.2)  | -       | -       |
| Vitamin B12 deficiency               | 1 (0.1)  | 1 (0.2)  | -       | -       |
| Vitamin D deficiency                 | 1 (0.1)  | 1 (0.2)  | 1 (0.3) | -       |

---

*AAP* abiraterone acetate plus prednisone/prednisolone; *AAP-PD* AAP after docetaxel; *CV* cardiovascular; *TEAE* treatment-emergent adverse event.

**Table S2** Treatment-emergent serious adverse events with occurrence in > 1% of patients who received AAP

|                                                                          | AAP        |
|--------------------------------------------------------------------------|------------|
| Number of patients exposed                                               | 1490       |
| Number of patients with at least one TESAE, <i>n</i> (%)                 | 496 (33.3) |
| <i>System-organ class/preferred term, n (%)</i>                          |            |
| General disorders and administration site conditions                     | 177 (11.9) |
| Disease progression                                                      | 55 (3.7)   |
| General physical health deterioration                                    | 53 (3.6)   |
| Death                                                                    | 28 (1.9)   |
| Vascular disorders                                                       | 19 (1.3)   |
| Infections and infestations                                              | 106 (7.1)  |
| Urinary tract infection                                                  | 24 (1.6)   |
| Pneumonia                                                                | 22 (1.5)   |
| Renal and urinary disorders                                              | 63 (4.2)   |
| Hematuria                                                                | 25 (1.7)   |
| Cardiac disorders                                                        | 58 (3.9)   |
| Cardiac failure                                                          | 15 (1.0)   |
| Musculoskeletal and connective tissue disorders                          | 48 (3.2)   |
| Back pain                                                                | 16 (1.1)   |
| Gastrointestinal disorders                                               | 47 (3.2)   |
| Injury, poisoning and procedural complications                           | 37 (2.5)   |
| Respiratory, thoracic and mediastinal disorders                          | 37 (2.5)   |
| Neoplasms benign, malignant and unspecified (including cysts and polyps) | 36 (2.4)   |
| Nervous system disorders                                                 | 36 (2.4)   |
| Blood and lymphatic system disorders                                     | 33 (2.2)   |
| Anemia                                                                   | 26 (1.7)   |

AAP abiraterone acetate plus prednisone/prednisolone, TESAE treatment-emergent serious adverse event.
